# Supplementary material for: Probing the bifunctional catalytic activity of ceria nanorods towards the cyanosilylation reaction
Source: Royal Society of Chemistry journal article supplement (doi:10.1039/c3cy00196b), 2013-01-01
Supplement: c3cy00196b.pdf [file c3cy00196b.pdf]

## Electronic Supplementary Information

### Probing the bifunctional catalytic activity of ceria nanorods towards the cyanosilylation reaction

Gonghua Wang,<sup>a,†</sup> Lu Wang,<sup>b</sup> Xiang Fei,<sup>a,\*</sup> Yunyun Zhou,<sup>a</sup> Renat F. Sabirianov,<sup>b</sup> Wai Ning Mei<sup>b</sup>  
and Chin Li Cheung<sup>a,\*</sup>

<sup>a</sup>*Department of Chemistry and Nebraska Centre for Materials and Nanoscience, University of Nebraska-Lincoln, Lincoln, NE 68588, United States.*

<sup>b</sup>*Department of Physics, University of Nebraska at Omaha, Omaha, NE 68182, United States*

<sup>†</sup> *Current address: Department of Mechanical and Materials Engineering, University of Nebraska-Lincoln, Lincoln, NE 68588, United States.*

<sup>\*</sup>*Phone: 1-402-472-5172; Fax: 1-402-472-9402; Email: ccheung2@unl.edu; xfei@huskers.unl.edu*

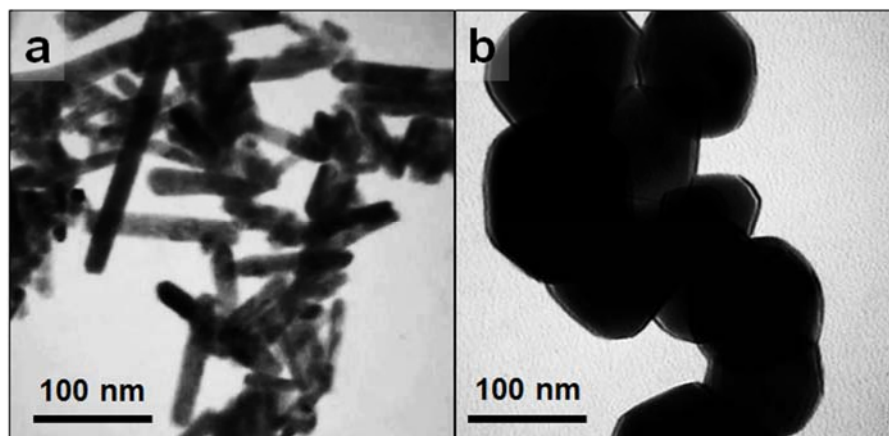

**Fig. S1** TEM images of ceria catalysts before activation: (a) as-synthesized ceria nanorods and (b) as-purchased bulk ceria.

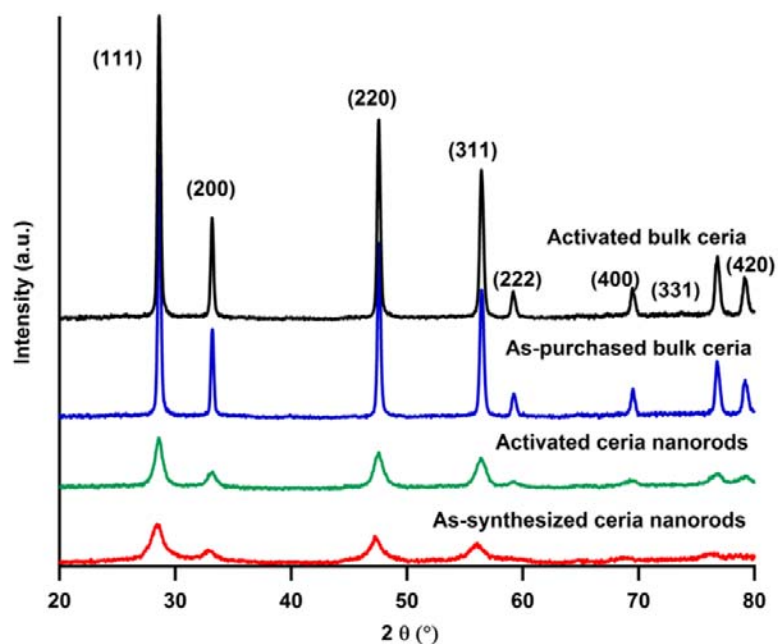

**Fig. S2** XRD patterns of ceria catalysts: (red) as-synthesized ceria nanorods, (green) activated ceria nanorods, (blue) as-purchased bulk ceria and (black) activated bulk ceria. XRD peaks are indexed according to ICDD card 04-013-4361 with respect to the cubic  $Fm\bar{3}m$  structure of cerium (IV) oxide ( $\text{CeO}_2$ ).

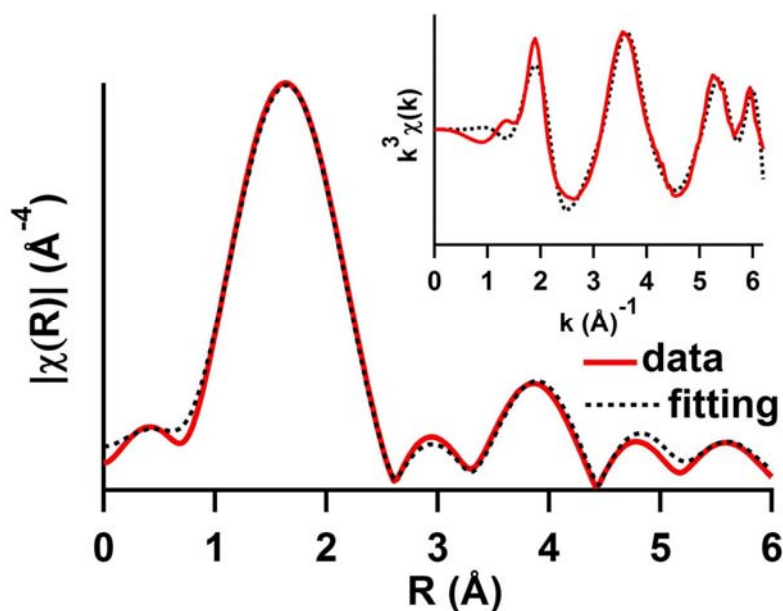

**Fig. S3** Fourier transformed Ce  $L_3$ -edge EXAFS data of unactivated ceria nanorods. The inset data are the corresponding EXAFS functions in  $k$  space. (Red lines: data; black dotted lines: fittings.)

**Table S1** Parameters of the local structure around Ce atoms obtained from curve fitting of the Ce  $L_{III}$ -edge EXAFS for unactivated and activated ceria nanorods and bulk ceria.

| Sample                                | Bond  | N              | R (Å)           | $\sigma$ ( $10^{-3}$ Å <sup>2</sup> ) | $\Delta E$ (eV)  |
|---------------------------------------|-------|----------------|-----------------|---------------------------------------|------------------|
| Unactivated ceria nanorods            | Ce-O  | $7.0 \pm 0.1$  | $2.11 \pm 0.01$ | $8.7 \pm 1.5$                         | $-0.84 \pm 0.57$ |
|                                       | Ce-Ce | $7.7 \pm 0.2$  | $3.92 \pm 0.02$ | $17.4 \pm 5.2$                        | $-2.68 \pm 1.51$ |
|                                       | Ce-O  | $18.4 \pm 2.1$ | $4.44 \pm 0.02$ | $15.1 \pm 4.9$                        | $-1.68 \pm 0.14$ |
| Activated ceria nanorods <sup>a</sup> | Ce-O  | $6.3 \pm 0.1$  | $2.29 \pm 0.01$ | $2.4 \pm 0.2$                         | $2.5 \pm 0.2$    |
|                                       | Ce-Ce | $7.4 \pm 0.4$  | $3.82 \pm 0.01$ | $2.2 \pm 0.5$                         | $-0.2 \pm 0.4$   |
|                                       | Ce-O  | $14.7 \pm 1.2$ | $4.52 \pm 0.01$ | $3.4 \pm 0.5$                         | $0.8 \pm 0.4$    |
| Bulk ceria <sup>a</sup>               | Ce-O  | $8.0 \pm 0.1$  | $2.32 \pm 0.01$ | $0.1 \pm 0.2$                         | $5.8 \pm 0.2$    |
|                                       | Ce-Ce | $12.0 \pm 0.3$ | $3.82 \pm 0.01$ | $0.1 \pm 0.5$                         | $-0.8 \pm 0.4$   |
|                                       | Ce-O  | $24.0 \pm 1.2$ | $4.48 \pm 0.01$ | $1.5 \pm 0.5$                         | $1.6 \pm 0.4$    |

**Notes:** <sup>a</sup> Data for similarly prepared samples reported in reference 2b of the text.

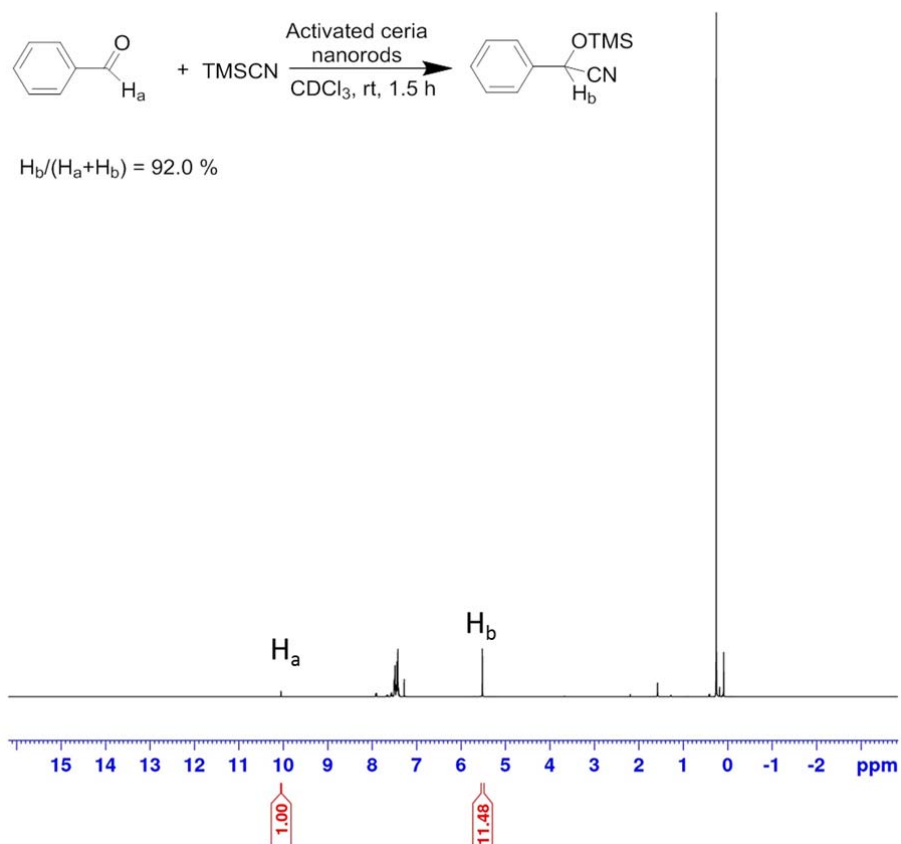

**Fig. S4** NMR spectrum of the reaction mixture for reaction between benzaldehyde and TMSCN in Table 2 Entry 1 catalyzed by activated ceria nanorods after 1.5 hours of reaction time.

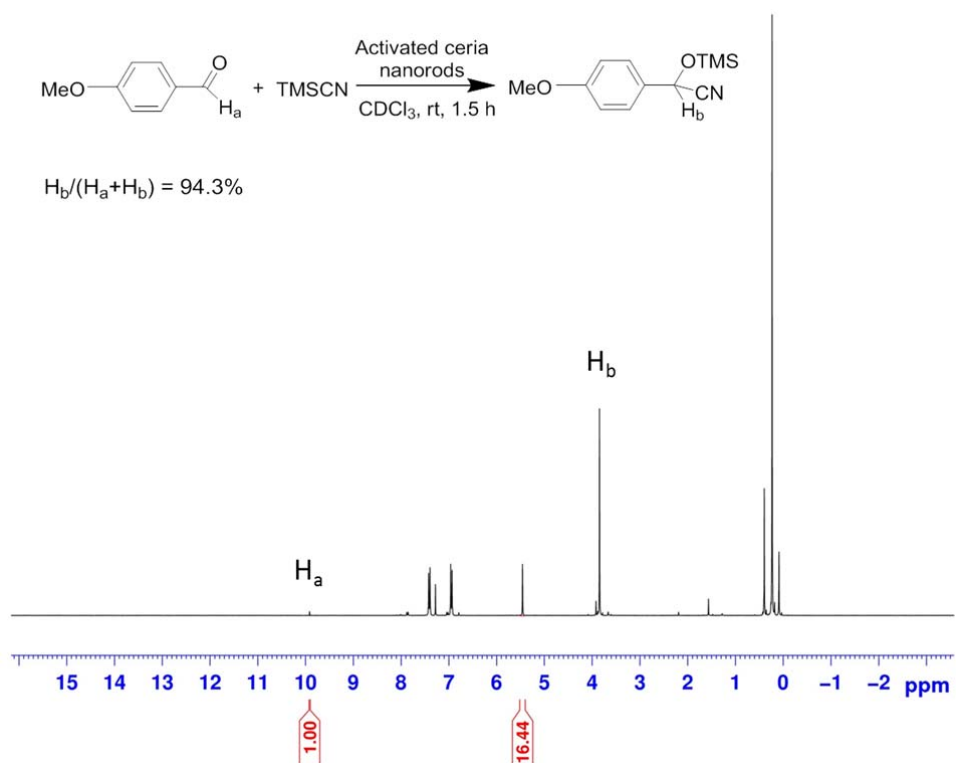

**Fig. S5** NMR spectrum of the reaction mixture for reaction between 4-methoxybenzaldehyde and TMSCN in Table 2 Entry 2 catalyzed by activated ceria nanorods after 1.5 hours of reaction time.

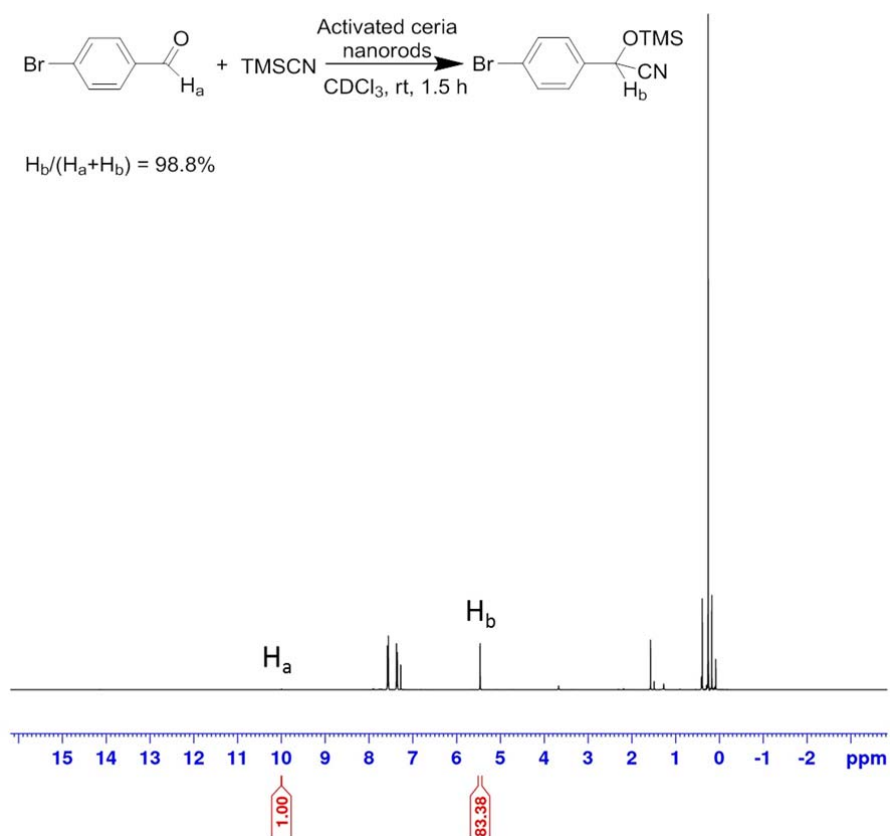

**Fig. S6** NMR spectrum of the reaction mixture for reaction between 4-bromobenzaldehyde and TMS-CN in Table 2 Entry 3 catalyzed by activated ceria nanorods after 1.5 hours of reaction time.

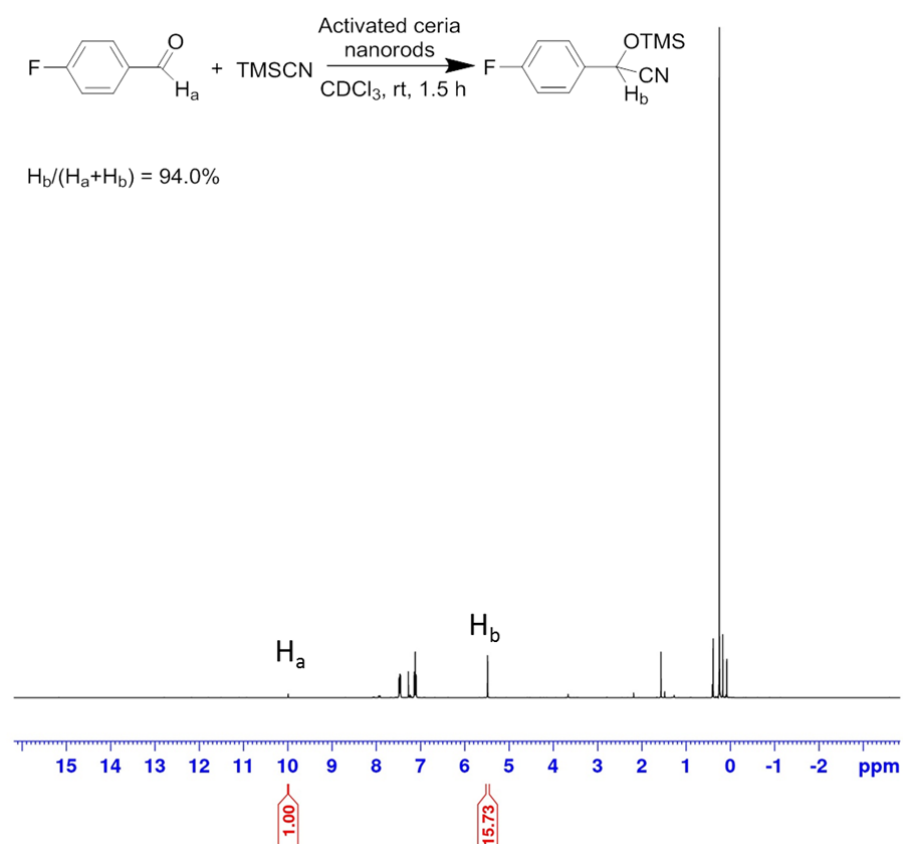

**Fig. S7** NMR spectrum of the reaction mixture for reaction between 4-fluorobenzaldehyde and TMSCN in Table 2 Entry 4 catalyzed by activated ceria nanorods after 1.5 hours of reaction time.

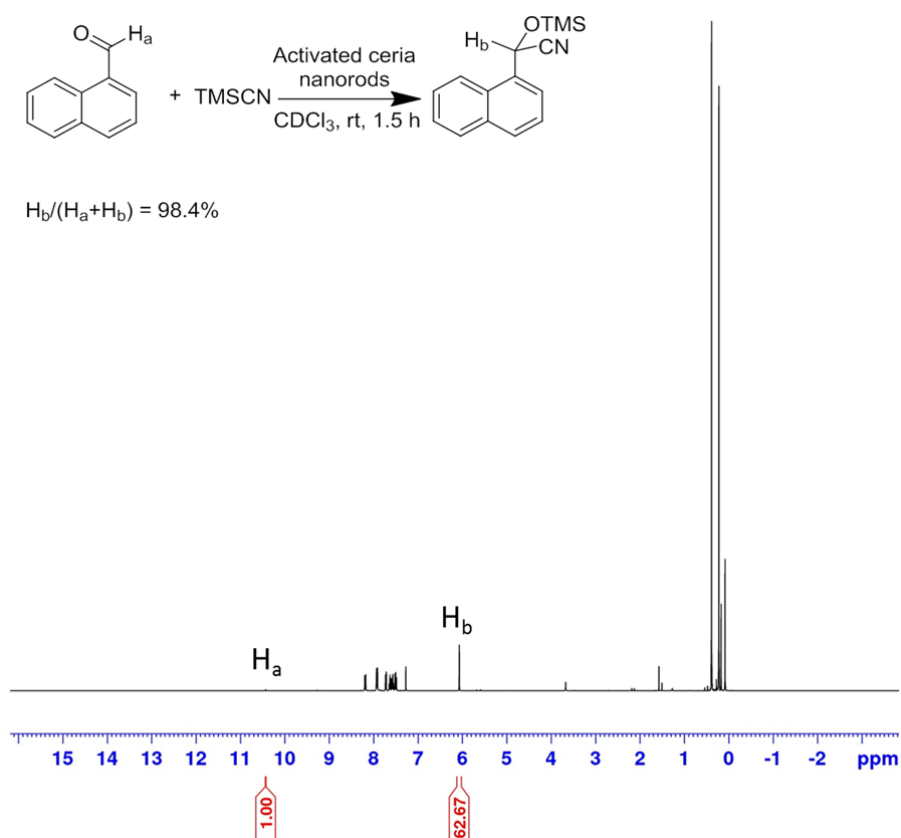

**Fig. S8** NMR spectrum of the reaction mixture for reaction between 1-naphthaldehyde and TMSCN in Table 2 Entry 5 catalyzed by activated ceria nanorods after 1.5 hours of reaction time.

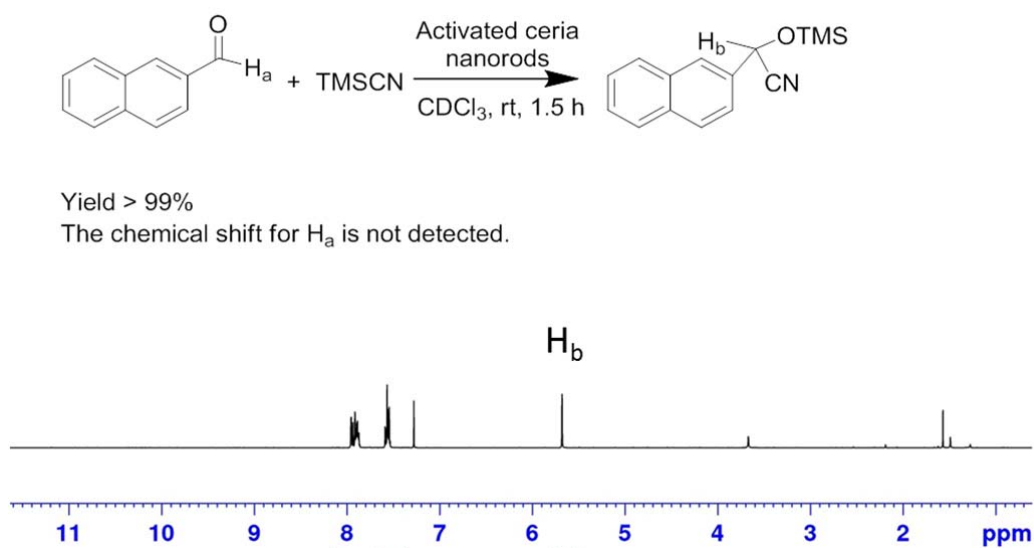

**Fig. S9** NMR spectrum of the reaction mixture for reaction between 2-naphthaldehyde and TMSCN in Table 2 Entry 6 catalyzed by activated ceria nanorods after 1.5 hours of reaction time.

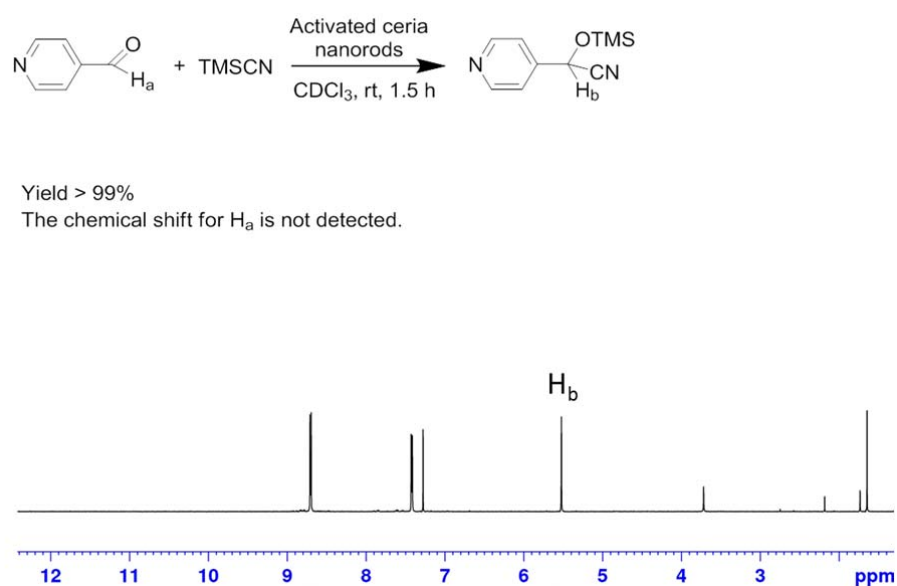

**Fig. S10** NMR spectrum of the reaction mixture for reaction between isonicotinaldehyde and TMS-CN in Table 2 Entry 7 catalyzed by activated ceria nanorods after 1.5 hours of reaction time.

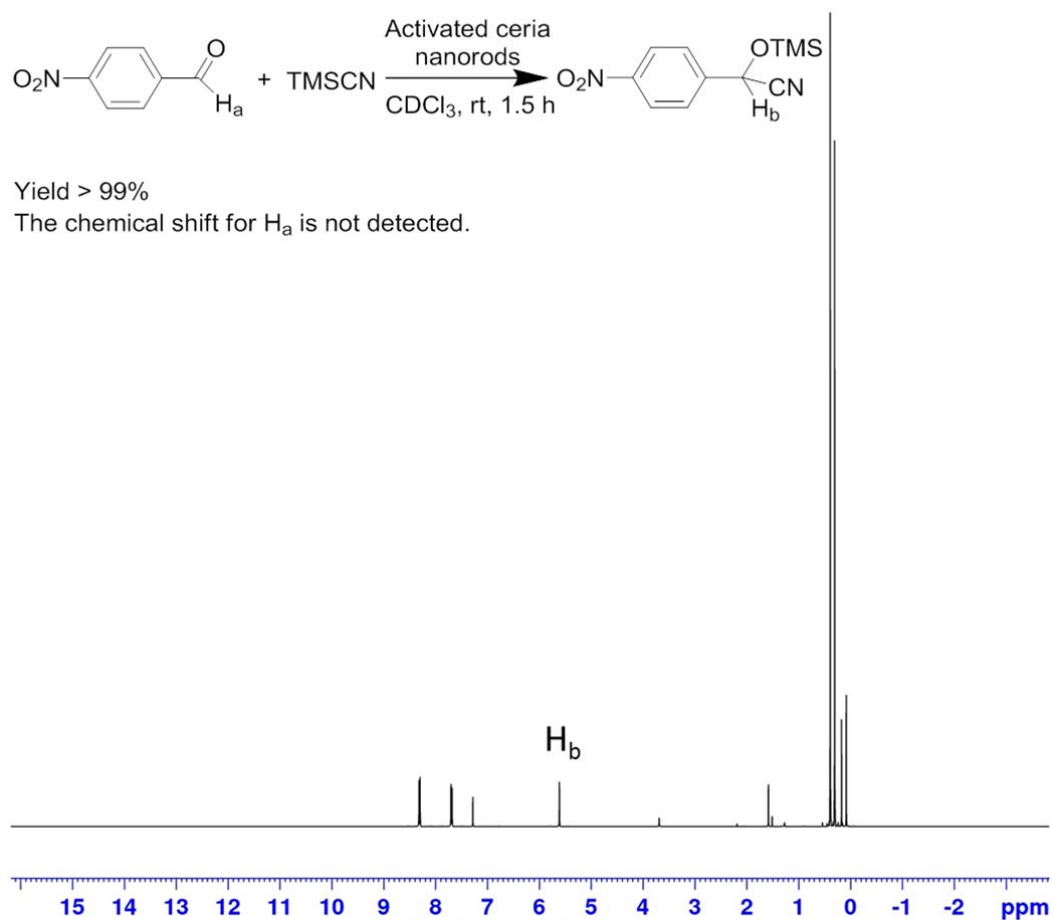

**Fig. S11** NMR spectrum of the reaction mixture for reaction between 4-nitrobenzaldehyde and TMS-CN in Table 2 Entry 8 catalyzed by activated ceria nanorods after 1.5 hours of reaction time.

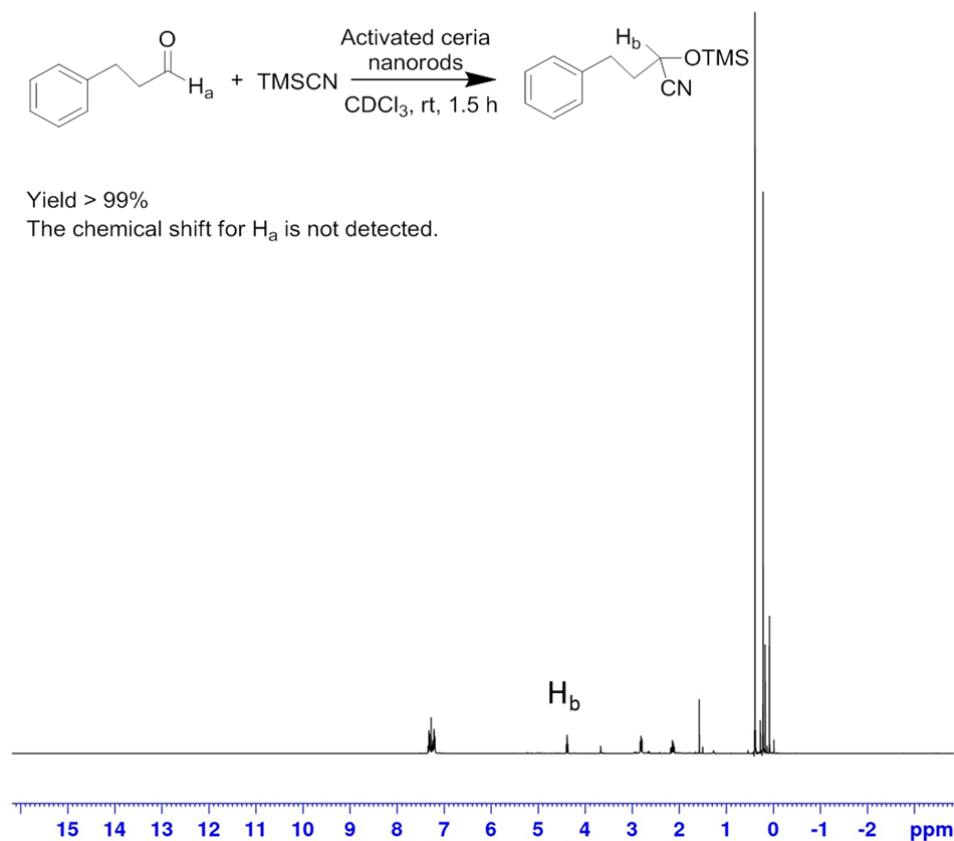

**Fig. S12** NMR spectrum of the reaction mixture for reaction between 3-phenylpropanal and TMSCN in Table 2 Entry 9 catalyzed by activated ceria nanorods after 1.5 hours of reaction time.

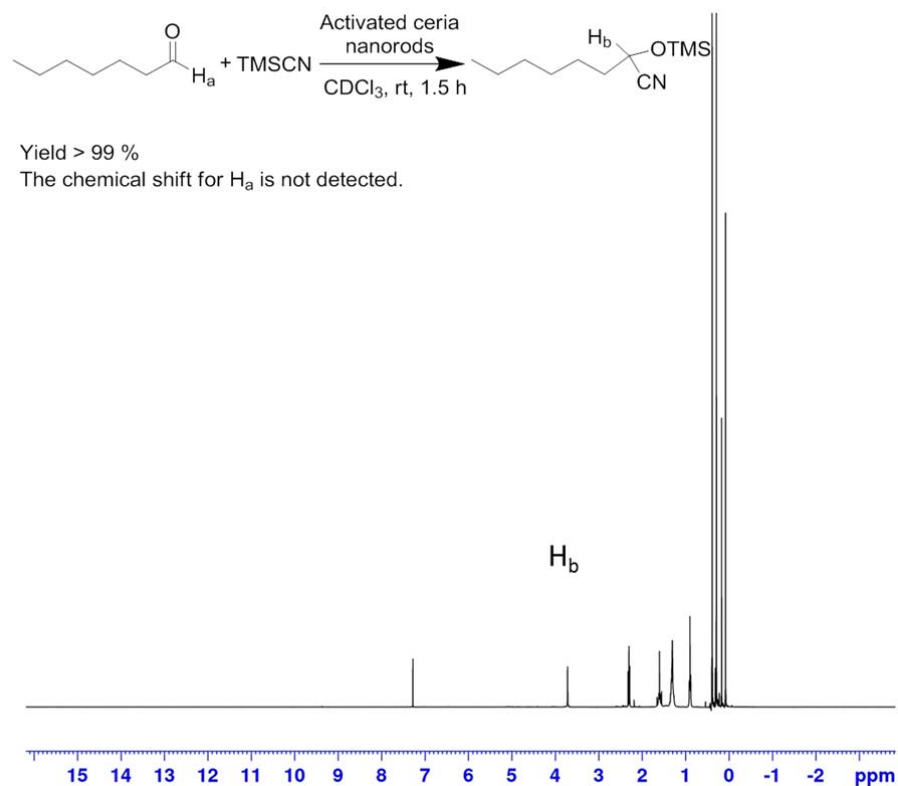

**Fig. S13** NMR spectrum of the reaction mixture for reaction between heptanal and TMSCN in Table 2 Entry 10 catalyzed by activated ceria nanorods after 1.5 hours of reaction time.

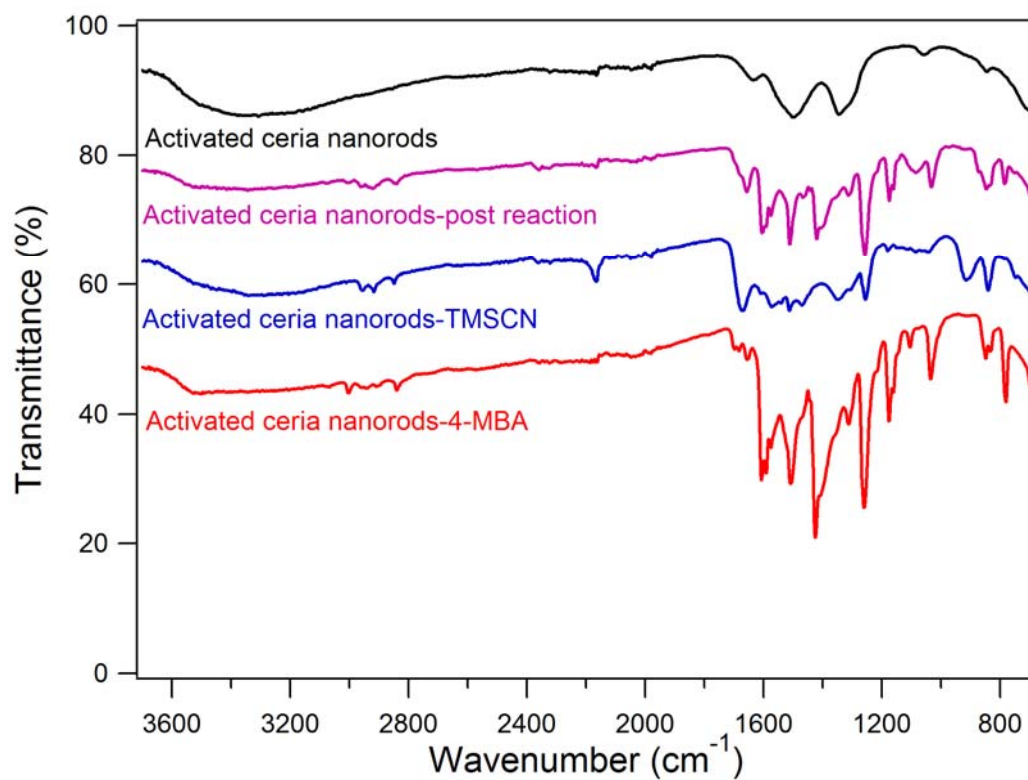

**Fig. S14** FTIR spectra of activated ceria nanorods catalyst, the post-reaction catalyst, and the catalysts after impregnation in 4-MBA and TMSCN. The spectra are shifted downward for presentation clarity.

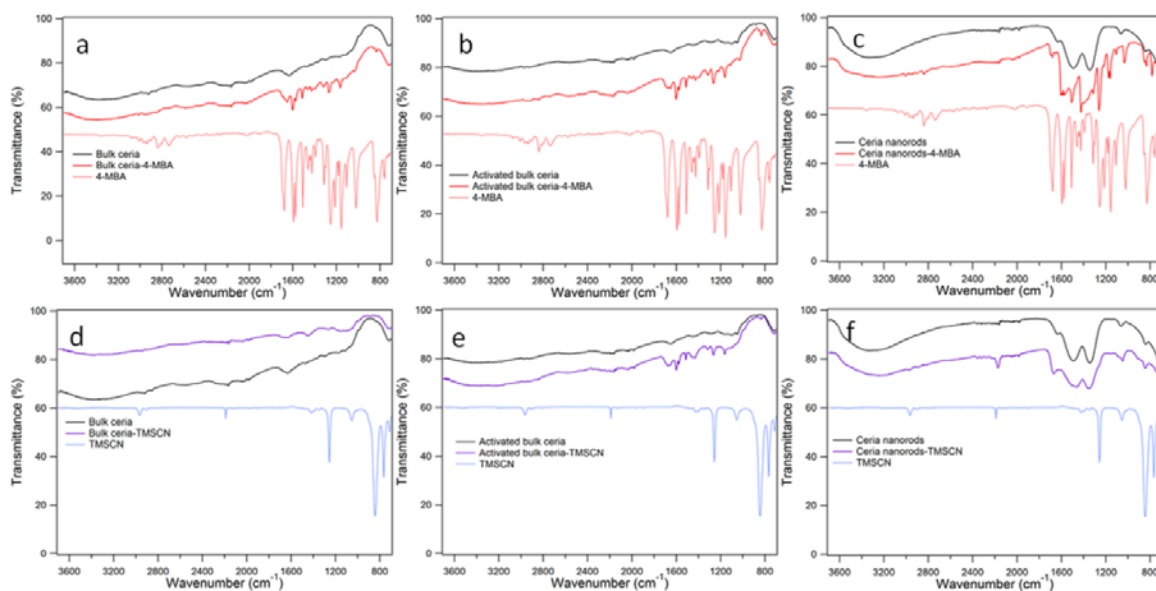

**Fig. S15** FTIR spectra of bulk ceria, activated bulk ceria, unactivated ceria nanorods before and after impregnation in (a-c) 4-MBA or (d-f) TMSiCN. The spectra of 4-MBA and TMSiCN are displayed for comparisons. The spectra are shifted downward for presentation clarity.

**Table S2** The infrared absorption frequency correlation table for the infrared spectra in Fig. 3, S14 and S15.

| Wavenumber (cm <sup>-1</sup> ) | Vibration <sup>1,2</sup>          |
|--------------------------------|-----------------------------------|
| 3000-2800                      | CH <sub>3</sub> C-H stretch       |
| 2740                           | C-H stretch in aldehyde           |
| 2190, 2166                     | C≡N stretch                       |
| 1680                           | C=O stretch in aldehyde           |
| 1606, 1591, 1508               | C-C stretches in the benzene ring |
| 1419                           | CH <sub>3</sub> twist             |
| 1356                           | CH <sub>3</sub> wag               |
| 1257                           | Si-CH <sub>3</sub> umbrella       |
| 1055                           | Si-O-Si asymmetric stretch        |
| 912                            | Silanol Si-O stretch              |
| 841                            | Si-CH <sub>3</sub> rock           |

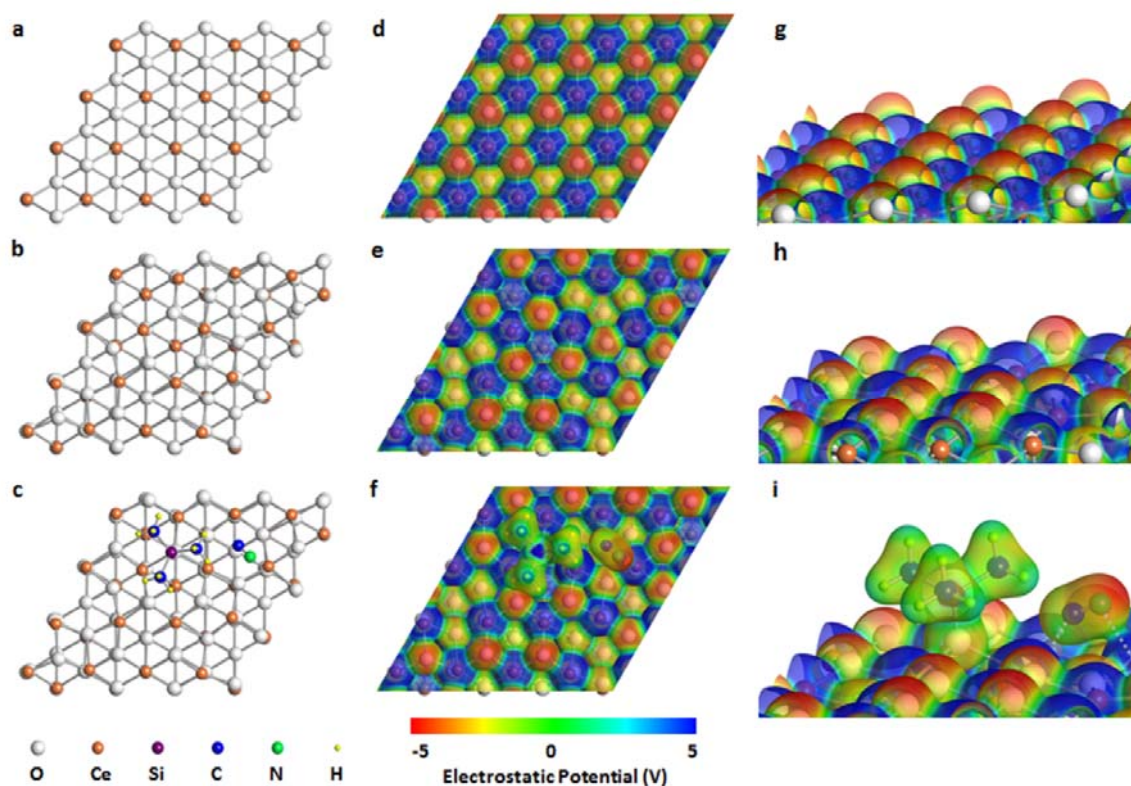

**Fig. S16** Structures of (a) CeO<sub>2</sub> slab, (b) CeO<sub>2-x</sub> slab and (c) TMSCN adsorbed on the CeO<sub>2-x</sub> slab. Isosurfaces of electron density (isovalue = 0.2 electron/Å<sup>3</sup>) of the three models color-coded with the electrostatic potential are illustrated from (d, e, f) top view and (g, h, i) zoomed-in angled view, respectively. The negative electrostatic potential around O-sites illustrates that O atoms are negatively charged, particularly that the surface O atoms are even more negatively charged than the subsurface ones. The positive electrostatic potential around Ce-sites suggests that the Ce atoms are positively charged.

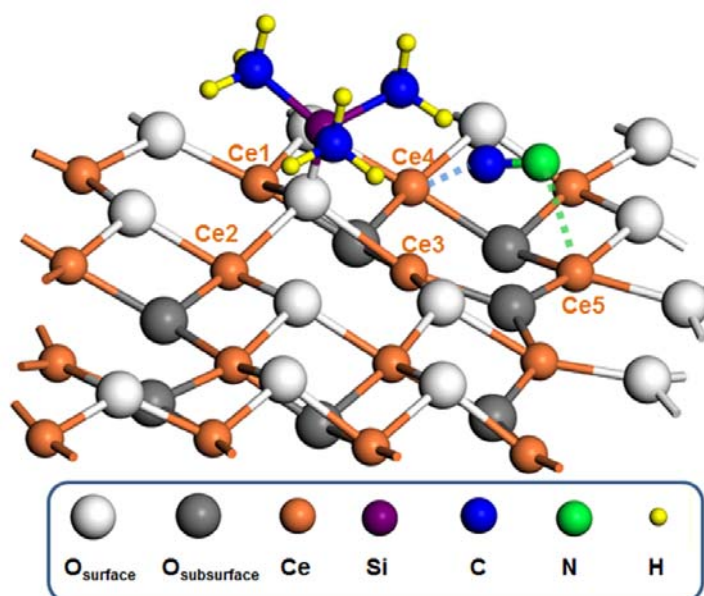

**Fig. S17** Side view of the optimized structure of a TMSCN molecule chemisorbed on the CeO<sub>2-x</sub> slab in the ball-and-stick representation.

**Table S3** Interatomic bond lengths (Å) in CeO<sub>2-x</sub> slab, TMSCN and TMSCN adsorbed on the CeO<sub>2-x</sub> slab model.

| Interatomic bond lengths (Å)         | Ce(1)-O | Ce(2)-O | Ce(3)-O | O-Si | Si-C (N) | C-N  | Ce(4)-C | Ce(5)-N |
|--------------------------------------|---------|---------|---------|------|----------|------|---------|---------|
| CeO <sub>2-x</sub>                   | 2.48    | 2.37    | 2.49    | –    | –        | –    | –       | –       |
| TMSCN                                | –       | –       | –       | –    | 1.86     | 1.17 | –       | –       |
| TMSCN adsorbed on CeO <sub>2-x</sub> | 2.61    | 2.62    | 2.74    | 1.68 | 4.57     | 1.19 | 2.82    | 2.66    |

**Table S4** Binding energies and atomic charges of individual atoms in the adsorption models.

| Models                                     | Binding Energy (eV) | Charge ( e ) |       |       |       |      |       |       |       |       |
|--------------------------------------------|---------------------|--------------|-------|-------|-------|------|-------|-------|-------|-------|
|                                            |                     | Ce(1)        | Ce(2) | Ce(3) | O     | Si   | C(N)  | N     | Ce(4) | Ce(5) |
| CeO <sub>2-x</sub>                         |                     | 2.69         | 2.68  | 2.74  | –1.65 | -    | -     | -     | 2.86  | 2.76  |
| TMSCN                                      | –6.28               | -            | -     | -     | -     | 1.51 | –0.28 | –0.27 | -     | -     |
| TMSCN adsorbed on CeO <sub>2-x</sub>       | –1.08               | 2.62         | 2.66  | 2.70  | –1.42 | 1.54 | –0.36 | –0.51 | 2.85  | 2.78  |
| CN detached from TMSCN- CeO <sub>2-x</sub> | 4.15                | -            | -     | -     | -     | -    | –0.44 | –0.23 | -     | -     |
| CN adsorbed on CeO <sub>2-x</sub>          | –5.25               | 2.69         | 2.71  | 2.80  | –1.64 | -    | –0.36 | –0.54 | 2.86  | 2.78  |
| TMS adsorbed on CeO <sub>2-x</sub>         | –2.11               | 2.61         | 2.64  | 2.72  | –1.42 | 1.53 | -     | -     | 2.83  | 2.69  |

**References**

(1) Smith, B. C. *Infrared spectral interpretation: a systematic approach*; 1<sup>st</sup> ed.; CRC Press LLC: Boca Raton, Florida, 1998.

(2) Thirupathi, B.; Patil, M. K.; Reddy, B. M. *Appl. Catal. A* 2010, **384**, 147-153.
